# Supplementary material for: Correlation of Individual Differences in Schizotypal Personality Traits With Amphetamine-Induced Dopamine Release in Striatal and Extrastriatal Brain Regions
Source: Atypon-hosted journal article supplement (doi:10.1176/appi.ajp.2010.10020165), 2010-12-16

TABLE S1. Baseline BPND and Dopamine Release in Striatal and Extrastriatal Regions of Interest

|                       | <b>BP<sub>ND</sub></b> |      | <b>ΔBP<sub>ND</sub> (%)</b> |      | <b>One Sample T-Test</b> |       |       |
|-----------------------|------------------------|------|-----------------------------|------|--------------------------|-------|-------|
|                       | Mean                   | SD   | Mean                        | SD   | df                       | t     | p     |
| <b>Whole Striatum</b> | 18.72                  | 3.17 | 6.18                        | 5.25 | 62                       | 9.33  | <.001 |
| <b>Ventral</b>        | 20.23                  | 3.67 | 6.16                        | 6.38 | 62                       | 7.66  | <.001 |
| <b>Associative</b>    | 17.02                  | 2.78 | 4.77                        | 5.60 | 62                       | 6.76  | <.001 |
| <b>Sensorimotor</b>   | 20.09                  | 3.46 | 8.11                        | 5.46 | 62                       | 11.80 | <.001 |
| <b>Amygdala</b>       | 1.88                   | 0.32 | 1.52                        | 7.57 | 62                       | 1.59  | .117  |
| <b>Hippocampus</b>    | 1.02                   | 0.11 | 2.25                        | 9.73 | 62                       | 1.83  | .072  |
| <b>Thalamus</b>       | 2.53                   | 0.29 | 2.50                        | 5.37 | 62                       | 3.69  | <.001 |

[See next page for Figure S1]

FIGURE S1. Correlation between disorganized schizotypal traits and dopamine release. Disorganized traits correlated with dopamine release in the (A) lateral temporal lobe, (B) thalamus, and (C) bilateral insula. Statistical parametric maps thresholded at  $p=0.05$  (whole brain cluster-level corrected).

**A**

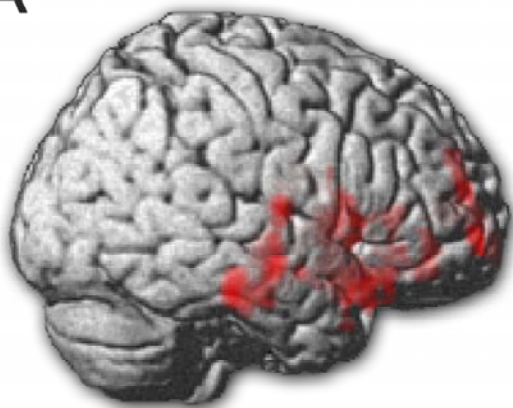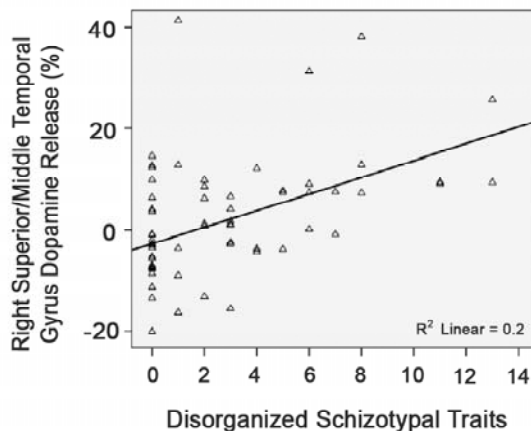

**B**

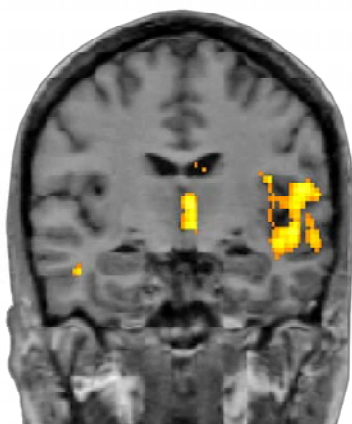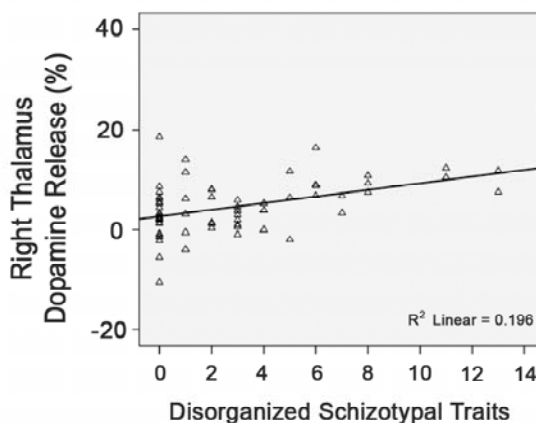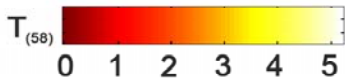

**C**

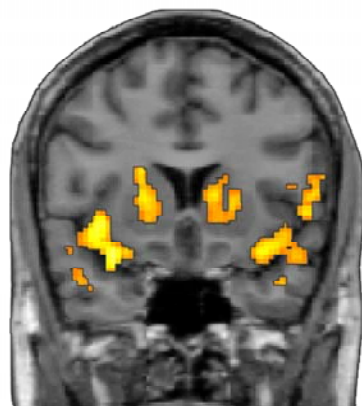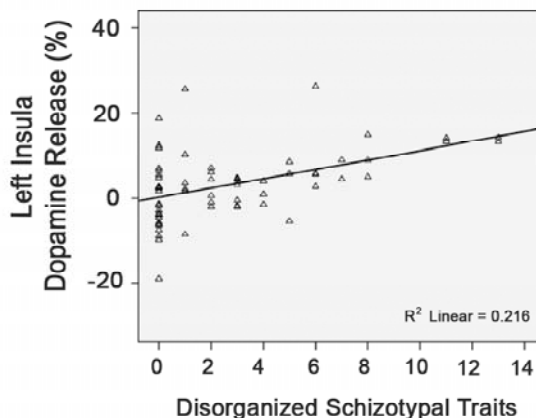

Supplement: ajp_168_04_418_01.pdf [file ajp_168_04_418_01.pdf]
